# Supplementary material for: Relationship Between High Organ Donation Rates and COVID-19 Vaccination Coverage
Source: PubMed Central journal article supplement (PMC9038079; doi:10.3389/fpubh.2022.855051), 2022-04-11
Supplement: Table_1.pdf [file Table_1.pdf]

Supplementary file 1

**Table: Examination of the common factors that propel vaccinations and organ donations**

a) Results of the Pearson's correlation coefficients

|                                                  | 1)      | 2)      | 3)      | 4) | 5) | 6) |
|--------------------------------------------------|---------|---------|---------|----|----|----|
| 1) Progress of vaccinations <sup>(1)</sup>       | -       |         |         |    |    |    |
| Pearson's correlation coefficients               |         |         |         |    |    |    |
| (Number of valid variables)                      |         |         |         |    |    |    |
| 2) Trust in medical professionals <sup>(2)</sup> |         | -       |         |    |    |    |
| Pearson's correlation coefficients               | 0.438** |         |         |    |    |    |
| (Number of valid variables)                      | (38)    |         |         |    |    |    |
| 3) Trust in the government <sup>(3)</sup>        |         |         | -       |    |    |    |
| Pearson's correlation coefficients               | 0.451** | 0.586** |         |    |    |    |
| (Number of valid variables)                      | (37)    | (37)    |         |    |    |    |
| 4) Social solidarity <sup>(4)</sup>              |         |         |         | -  |    |    |
| Pearson's correlation coefficients               | 0.232   | 0.734** | 0.643** |    |    |    |

|                                    |         |         |         |         |         |
|------------------------------------|---------|---------|---------|---------|---------|
| (Number of valid variables)        | (26)    | (26)    | (25)    |         |         |
| 5) GDP <sup>(5)</sup>              |         |         |         |         | -       |
| Pearson's correlation coefficients | 0.348*  | 0.502** | 0.663** | 0.604** |         |
| (Number of valid variables)        | (38)    | (38)    | (37)    | (26)    |         |
| 6) Organ donations <sup>(6)</sup>  |         |         |         |         | -       |
| Pearson's correlation coefficients | 0.457** | 0.592** | 0.267   | 0.497*  | 0.453** |
| (Number of valid variables)        | (37)    | (37)    | (36)    | (25)    | (37)    |

\*\*p<0.01, \*p<0.05.

b) Results of the multiple linear regression

| Response variable                       | Explanatory variable                            | Unstandardized |           | Standardized | t value | Adjusted R Square |
|-----------------------------------------|-------------------------------------------------|----------------|-----------|--------------|---------|-------------------|
|                                         |                                                 | Coefficients   |           | Coefficients |         |                   |
|                                         |                                                 | B              | St. Error | $\beta$      |         |                   |
| Progress of vaccinations <sup>(1)</sup> | Trust in medical professionals <sup>(2)**</sup> | 0.432          | 0.126     | 0.801        | 3.416   | 0.412             |
|                                         | Trust in the government <sup>(3)</sup>          | 0.231          | 0.171     | 0.358        | 1.352   |                   |

---

|                          |                                                 |          |        |        |        |       |
|--------------------------|-------------------------------------------------|----------|--------|--------|--------|-------|
|                          | Social solidarity <sup>(4)*</sup>               | -106.407 | 43.391 | -0.636 | -2.452 |       |
|                          | GDP <sup>(5)</sup>                              | 0.037    | 0.105  | 0.087  | 0.349  |       |
|                          | (Const.)**                                      | 121.410  | 30.409 |        | 3.993  |       |
| Organ                    | Trust in medical professionals <sup>(2)**</sup> | 0.948    | 0.259  | 0.812  | 3.655  | 0.486 |
| donations <sup>(6)</sup> | Trust in the government <sup>(3)</sup>          | -0.395   | 0.350  | -0.264 | -1.129 |       |
|                          | Social solidarity <sup>(4)</sup>                | 15.754   | 95.876 | 0.044  | 0.170  |       |
|                          | GDP <sup>(5)</sup>                              | 0.098    | 0.262  | 0.087  | 0.373  |       |
|                          | (Const.)                                        | 14.336   | 64.583 |        | 0.222  |       |

---

---

\*\*p<0.01, \*p<0.05.

- (1) The degree of COVID-19 vaccination progress utilizes data as of October 1, 2021. Data source: Our World in Data (<https://ourworldindata.org/covid-vaccinations>) “Share of people vaccinated against COVID-19,” which indicates the percentage of vaccinated people in the population. Those both fully and partly vaccinated against COVID-19 were included in the study.
- (2) Gallup. “Confidence and trust in health professionals and hospitals” (Chart 3.6 & Q11E in Appendix D: Dataset and crosstabs for all countries). Wellcome Global Monitor 2018 (<https://wellcome.org/reports/wellcome-global-monitor/2018>).
- (3) OECD. “Trust in Government” (10. Core Government Results). Government at a Glance (2019). <https://doi.org/10.1787/8ccf5c38-en>.
- (4) “Solidarity index by country” (Table 5). Sanz García M, Caselles A, Micó Ruiz JC, Soler Fernández D. Development of the Happiness Index in a country. Systems & Design: Beyond Processes and Thinking (2016) 807–818. <http://dx.doi.org/10.4995/IFDP.2016.3096>.
- (5) International Monetary Fund. GDP (nominal) per capita. "World Economic Outlook Database, April 2021".
- (6) Organ transplant data shows the number of transplants per one million population in all countries in 2019. Global Observatory on Donation and Transplantation(<http://www.transplant-observatory.org/>) was utilized.
